# Supplementary material
Source: PubMed Central journal article supplement (PMC117378)
Supplement: pnas_99_2_757__8.pdf [file pnas_99_2_757__8.pdf]

## Bicoid (Bcd)

### Matrix

|   |    |    |    |    |    |    |    |    |
|---|----|----|----|----|----|----|----|----|
| A | 9  | 11 | 49 | 51 | 0  | 1  | 1  | 4  |
| C | 19 | 3  | 0  | 0  | 0  | 45 | 25 | 16 |
| T | 18 | 36 | 0  | 0  | 34 | 5  | 21 | 10 |
| G | 5  | 1  | 2  | 0  | 17 | 0  | 4  | 21 |

### Sequence Logo

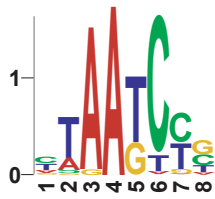

### Sequences

| Sequence                     | Target Gene | Ref |
|------------------------------|-------------|-----|
| catccgCTAAGCTCccg            | hb          | (1) |
| tcgctgCTAAGCTGgcc            | hb          | (1) |
| gatttggATGATCCGgg            | hb          | (1) |
| gtcataatcacctTTAATCCCaagtact | hb          | (1) |
| ttctgctCTAATCCAgaatgg        | hb          | (1) |
| ccaacGTAATCCCcata            | hb          | (1) |
| cccatCTAATCCCttgacgc         | hb          | (1) |
| catgCTAATCTGatgactga         | hb          | (1) |
| ctgaacTAAATCCGgctt           | kr          | (2) |
| aatTTAATCCGtttct             | kr          | (2) |
| gacaaATAATCCAgcct            | kr          | (2) |
| gtctgTTAATCTCggc             | kr          | (2) |
| catggtgaTTAAGCTT             | kr          | (2) |
| ttcctTAAATCCGtctg            | kr          | (2) |
| gcccCTAATCCCttcgaca          | eve         | (3) |
| cttggCTAATCCCagca            | eve         | (3) |
| gactaATAATCTCgctg            | eve         | (3) |
| ccgtgTTAATCCGtttg            | eve         | (3) |
| ggactATAATCGCacaa            | eve         | (3) |
| attcctcgactTTAAGCTCgccgc     | tll         | (4) |
| actttaaaATAATTTTatatt        | tll         | (4) |
| ctaaaatccGTAATCTGcttaag      | tll         | (4) |
| aaataaaaaCAAATATtgcatttctt   | tll         | (4) |
| cagtgcctCTAATCTCgcttggtc     | tll         | (4) |
| ggcaacgcCTAATCTGgctcagc      | tll         | (4) |
| ctTGAATCCTaaaggctctcaa       | tll         | (4) |
| aaacgcaatCTGAGCTCcg          | tll         | (4) |
| gttacCTAATCGCgg              | kni         | (5) |

|                        |       |     |
|------------------------|-------|-----|
| ctaggATAATCTGcag       | kni   | (5) |
| ggtacCTAAGCCAgc        | kni   | (5) |
| cttacCTAAGCTGcag       | kni   | (5) |
| taacGAAATCGCtgg        | kni   | (5) |
| GTAAGCTGatcccgcg       | kni   | (5) |
| caatccTCAATCCGcgatccgt | hb    | (6) |
| tggctgCAAATCCGacg      | spalt | (7) |
| ccacggaCAAATCCTttggcc  | spalt | (7) |
| tggctgCAAATCCGacg      | spalt | (7) |
| gaattATAATCCCttcgatcg  | spalt | (7) |
| tactaaTTAAGCATggctcaa  | spalt | (7) |
| tcttcgATAAGCCGgaggaa   | spalt | (7) |
| ttGCAAGCCGtttttcagggcg | spalt | (7) |
| TAAAGTTGatcattagt      | h     | (8) |
| cttgaCAAATCGCcgctg     | h     | (8) |
| agcaaacgtTAAAGTTG      | h     | (8) |
| atcttTTAATCTTgata      | h     | (8) |
| accagTCAATCTGgact      | h     | (8) |
| tctacTTAAGCCGaaaa      | h     | (8) |
| aagcaagaCTAATTTTt      | h     | (8) |
| gttttTTAAGCCTtttgc     | h     | (9) |
| caAAAAGTCAaatgc        | h     | (9) |
| ttttTTAAGCCTttc        | h     | (9) |

## Caudal (Cad)

### Matrix

|   |   |   |    |    |    |    |    |    |    |    |
|---|---|---|----|----|----|----|----|----|----|----|
| A | 4 | 4 | 8  | 5  | 14 | 0  | 34 | 34 | 34 | 17 |
| C | 1 | 2 | 7  | 18 | 7  | 7  | 0  | 0  | 0  | 3  |
| T | 2 | 4 | 12 | 7  | 6  | 24 | 0  | 0  | 0  | 6  |
| G | 2 | 5 | 7  | 4  | 7  | 3  | 0  | 0  | 0  | 8  |

### Sequence Logo

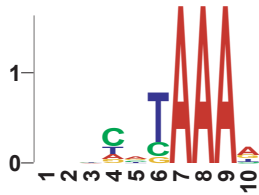

### Sequences

| Sequence          | Target Gene | Ref  |
|-------------------|-------------|------|
| AACCATAAAC        | ftz         | (10) |
| AGACATAAAA        | ftz         | (10) |
| AATCATAAAG        | ftz         | (10) |
| TCCCTAAAA         | ftz         | (10) |
| -TAACGAAATcg      | kni         | (5)  |
| -GTCATAAAGtc      | kni         | (5)  |
| -GGCCTAAAAaa      | kni         | (5)  |
| -CGTGCAAACgt      | kni         | (5)  |
| -ACCATAAATtg      | kni         | (5)  |
| -GAGCCAAACaa      | kni         | (5)  |
| GTGCATAAAT        | en          | (11) |
| TCACATAAAG        | en          | (11) |
| GGCCATAAAA        | en          | (11) |
| --TAATAAATtcc     | h           | (9)  |
| --TTTTAAAAaat     | h           | (9)  |
| tgcCAAATAAAGat    | h           | (9)  |
| --TTGTAAAAccc     | h           | (9)  |
| --TGCCAAAAtaaagat | h           | (9)  |
| --TTCTAAAAaaa     | h           | (9)  |
| --TGGTAAAAaga     | h           | (9)  |
| --CAATAAAGtct     | h           | (9)  |
| --GCTTAAAAaaa     | h           | (9)  |
| --CCCGAAAGagt     | h           | (9)  |
| --TTACAAAGacg     | h           | (9)  |
| --GTTCAAATcag     | h           | (9)  |
| --TCGTAAAAccc     | h           | (9)  |

|                         |   |     |
|-------------------------|---|-----|
| --CCATAAAAaa            | h | (9) |
| --TCGCAAAAaaa           | h | (9) |
| --ACTTAAAAacatagtttc    | h | (9) |
| --GCTTAAAAac            | h | (9) |
| --AGATAAAGaag           | h | (9) |
| aatcaaaaaATGTGGAAATtcc  | h | (9) |
| --AATCAAAAaatgtggaattcc | h | (9) |
| --TCGTAAAAaac           | h | (9) |

## Hunchback (Hb)

### Matrix

|   |    |    |    |    |    |    |    |    |    |    |    |
|---|----|----|----|----|----|----|----|----|----|----|----|
| A | 12 | 0  | 1  | 0  | 0  | 0  | 49 | 17 | 2  | 27 | 9  |
| C | 12 | 0  | 4  | 0  | 0  | 1  | 9  | 17 | 18 | 25 | 26 |
| T | 59 | 93 | 86 | 93 | 93 | 92 | 9  | 47 | 28 | 17 | 30 |
| G | 10 | 0  | 2  | 0  | 0  | 0  | 26 | 12 | 45 | 24 | 28 |

### Sequence Logo

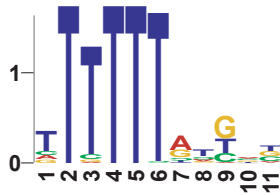

### Sequences

| Sequence                  | Target Gene | Ref  |
|---------------------------|-------------|------|
| tggggttATTTTTTGGCGc       | eve         | (12) |
| tatgtGTTTTTATGACtt        | eve         | (12) |
| cccacgaTTTTTTTGGCC        | eve         | (12) |
| tgetCTCTTTACGGTtta        | eve         | (12) |
| cccaATTTTTTAGTGGaaa       | eve         | (12) |
| cagATTTTTTATGGGtcc        | eve         | (12) |
| tcagTTTTTTGTTTTggc        | eve         | (12) |
| ctcGTTTTTAAGATccg         | eve         | (12) |
| gcgcCTTTTTTATGGtgc        | eve         | (12) |
| accgATTTTTTGTGCCcgg       | eve         | (12) |
| cgcGTTTTTAATGCttac        | eve         | (12) |
| ctagtTTTTTTCCCCaac        | eve         | (12) |
| cagcTTCTTTGTTCCggg        | eve         | (12) |
| cacgTTTTTTGTTCCcat        | eve         | (12) |
| gcgCTTTTTTCGCTgcg         | eve         | (12) |
| ctaaTTTTTTAATTcattca      | eve         | (12) |
| tcacGTTTTTACGAGctc        | eve         | (12) |
| atatatagTTGTTTAATTataatt  | hb          | (13) |
| CTTTTTCCCGTtttgcgtttttaa  | hb          | (13) |
| gcgcataaTTTTTTGTTTTctgctc | hb          | (13) |
| tattccacCTTTTTAAGCTaattt  | hb          | (13) |
| tagaccaATTTTTTTCCCaagcgg  | hb          | (13) |
| ctttgccgTTTTTTGGCATctccg  | hb          | (13) |
| gccaaattgTTTTTTGGGCAacttt | hb          | (13) |
| atagtttttTTTTTTAGTCCaaaa  | hb          | (13) |
| gtgcgaATTTTTTAAGCGgaaa    | ubx         | (14) |
| aacacacaTTTTTTTATGGCgcatt | ubx         | (14) |

|                            |       |      |
|----------------------------|-------|------|
| tgctaaatcATTTTTTAAGGGaaaa  | ubx   | (14) |
| aatcataaTTTTTTGCCATggct    | ubx   | (14) |
| cgaaggcaccTTTTTTAATGGccgac | ubx   | (14) |
| at ttggTTTTTTTACCAAcagcct  | ubx   | (14) |
| ttggacgcagTTTTTTATTAGcca   | ubx   | (14) |
| tgtaCTTTTTTATGACctc        | ubx   | (15) |
| gcagtTTTTTTACGAGgt         | ubx   | (15) |
| acgaTTTTTTAATGTttc         | ubx   | (15) |
| accgTTTTTTATGTGtgc         | ubx   | (15) |
| ttaaaTTTTTTCAGACaaa        | kr    | (2)  |
| acatCTTTTTTGCATtgt         | kr    | (2)  |
| at ttatatTTTTTTTGCTTTt     | kr    | (2)  |
| acactttttCTTTTTCTGATc      | kr    | (2)  |
| aattgCTTTTTTATGATcatgc     | kr    | (2)  |
| gcattGTTTTTACTTTgac        | kr    | (2)  |
| gttGTTTTTAAGAGaa           | kr    | (2)  |
| cgacgcGTTTTTTCGCGact       | kr    | (2)  |
| tgcattgtTTTTTTTTCAGtttc    | kr    | (2)  |
| ttgacaTTTTTTGTTGTt         | kr    | (2)  |
| taatTTATTTATTTGCCca        | en    | (16) |
| ctgTTTTTCAAGGCaca          | en    | (16) |
| tgcgTTTTTTCCCGTt           | kni   | (17) |
| tgacTTTTTTACAAGc           | kni   | (17) |
| agtcTTTTTTATGGTg           | kni   | (17) |
| ttaagTTTTTTGCCGC           | kni   | (17) |
| gttTTTTTTATTATtt           | kni   | (17) |
| aatatGTTTTTATGAGagg        | h     | (18) |
| ataaaTTTTTTTTTCCCcta       | h     | (18) |
| tcgtcCTTTTTTATGTTgtc       | h     | (18) |
| catttTTTTTTCTTCctc         | h     | (18) |
| cgagATTTTTTGCGTAatt        | h     | (18) |
| gttccATTTTTTAGCGGaac       | h     | (18) |
| cgcagATTTTTTAGTGCgaa       | h     | (18) |
| ctctcTTTTTTGTTGttc         | h     | (18) |
| taattaTTTTTTATGAGttc       | h     | (18) |
| ttttcTTTTTTGTGGTtag        | h     | (18) |
| tcateTTTTTTGTACGtg         | h     | (18) |
| tcccaTTTTTTGTTCTaat        | h     | (18) |
| gctgttCTTTTTGGCCctg        | h     | (18) |
| catgaTTTTTTATTGccc         | h     | (18) |
| ttgcaATTTTTGTGGTttt        | h     | (18) |
| cgcacTTCTTTGTGGCag         | h     | (18) |
| acccaATTTTTTAGCTAata       | h     | (18) |
| ggctgagTTTTTTAGGCCaattct   | kni   | (5)  |
| ctgcgTTTTTTGTAAC           | kni   | (5)  |
| tccgcaaTTTTTTAAGCGgaaa     | kni   | (5)  |
| ttgcaagccGTTTTTCAGGGgcg    | spalt | (7)  |
| ttgtgTTTTTTCTGCTtt         | h     | (8)  |
| tttttTTTTTTTGTGATtc        | h     | (8)  |
| ggcaaCTTTTTGGGAAtt         | h     | (8)  |

|                                 |       |      |
|---------------------------------|-------|------|
| tctacTTTTTTATGGcc               | h     | (8)  |
| taatcTTTTTTATTAAat              | h     | (8)  |
| gtgcgTTTTTTGTGCCca              | h     | (8)  |
| cctccgtccgTTTTTTAAGCCtttctg     | h     | (9)  |
| gtttttttTTTTTTGTTTTtttttagaagtg | h     | (9)  |
| cgcaaaccctTTTTTTGTCTTgt         | h     | (9)  |
| tcaaatgcgaTTTTTTATGGGaa         | h     | (9)  |
| aacaataaaTTTTTTGACCAgattccgg    | h     | (9)  |
| gggctgTTTTTTAAGCC               | h     | (9)  |
| ggatcgagTTTTTTACGATcctca        | h     | (9)  |
| gacatcTTCTTTATCTAt              | h     | (9)  |
| ttTGTTTCTTATtttttagca           | abd-b | (19) |
| gtttccgctgcaTTTTTTATGAGactg     | abd-b | (19) |
| tcaacggcaaTTTTTTATGGTttgca      | abd-b | (19) |
| attgtcccTTTTTTATTTTgtctgct      | abd-b | (19) |
| cgaaTTTTTTGCGCGac               | abd-b | (19) |

# Krüppel (Kr)

## Matrix

|   |    |    |    |    |    |    |    |    |    |    |
|---|----|----|----|----|----|----|----|----|----|----|
| A | 16 | 27 | 25 | 15 | 0  | 3  | 5  | 0  | 1  | 22 |
| C | 4  | 1  | 3  | 7  | 0  | 0  | 2  | 0  | 3  | 1  |
| T | 2  | 0  | 1  | 4  | 1  | 0  | 0  | 28 | 21 | 3  |
| G | 7  | 1  | 0  | 3  | 28 | 26 | 22 | 1  | 4  | 3  |

## Sequence Logo

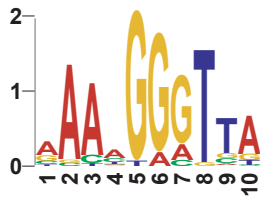

## Sequences

| Sequence                                  | Target Gene | Ref  |
|-------------------------------------------|-------------|------|
| tagcggcatAAAAGGGTTAaacaggtagc             | kni         | (20) |
| gcgcgcccatAAAAGGGTTAagcaca                | kni         | (20) |
| gaAAAAGGGGCatttacgga                      | hb          | (13) |
| gcgAACTGGGTTAttttt                        | eve         | (12) |
| aatTATTGGGTTAtattg                        | eve         | (12) |
| tgtcGAAGGGATTAggggc                       | eve         | (12) |
| ctcaAAACGGGTTAagctc                       | eve         | (12) |
| cgaGACCGGGTTGcgaag                        | eve         | (12) |
| ggcAAACGGATTAacacg                        | eve         | (12) |
| attTAACTGGTTAattga                        | en          | (16) |
| tgcAAAAGGGTCacggat                        | ubx         | (14) |
| gtttCCACGGATTAgacc                        | h           | (21) |
| cctCAACGGGTTTtacga                        | h           | (21) |
| gcaGAAAGGCTTAaaaaa                        | h           | (20) |
| actGAACGGGTCagagga                        | h           | (21) |
| caaAAAAGGGTTTtgcgg                        | h           | (21) |
| ggcAAAAGGCTTAaaaaa                        | h           | (21) |
| gcgtGAAAGGGTGAagcta                       | abd-a       | (22) |
| acaataaatattcataAAAAGAGTTAagtgcc          | kni         | (5)  |
| agttgacttttAAAAGGGTTAcaatt                | kni         | (5)  |
| gcgcattgtaccAAAAGGGTTGttcagac             | kni         | (5)  |
| acgcAAAAGGATGGcacaaatttcacgc              | spalt       | (7)  |
| ccgatcGAAGGGATTAtaatt                     | spalt       | (7)  |
| ggacaaatcctttggccaacAAAAGGGTAAatggctgcaaa | spalt       | (7)  |
| ggttaagcaaaggagtgatagAAATGGGTGAaattctgttc | spalt       | (7)  |
| tggCAAAGGGTTTcgccc                        | h           | (23) |
| tcaAGCTGAGTTAaaact                        | h           | (23) |
| cacCAAAGGGTTCgtgag                        | h           | (23) |
| gtaGAAGGAGTGAcactc                        | h           | (23) |



## Knirps (Kni)

### Matrix

|   |   |   |   |   |   |   |   |   |   |   |
|---|---|---|---|---|---|---|---|---|---|---|
| A | 5 | 5 | 1 | 0 | 4 | 0 | 3 | 0 | 0 | 5 |
| C | 0 | 0 | 3 | 0 | 1 | 0 | 1 | 1 | 5 | 0 |
| T | 0 | 0 | 0 | 3 | 0 | 0 | 0 | 2 | 0 | 0 |
| G | 0 | 0 | 1 | 2 | 0 | 5 | 1 | 2 | 0 | 0 |

### Sequence Logo

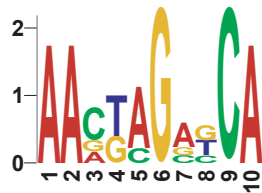

### Sequences

| Sequence        | Target Gene | Ref  |
|-----------------|-------------|------|
| AAAGAGAGCaccggg | eve         | (24) |
| atgggAACGCGGCCA | eve         | (24) |
| agaaAACTAGATCA  | eve         | (24) |
| AACTAGCGCAgcga  | eve         | (24) |
| aggaAAGTAGATCA  | eve         | (24) |

## References for Supplementary Figure 5

1. Driever, W. & Nusslein-Volhard, C. (1989) *Nature* **337**, 138-43.
2. Hoch, M., Seifert, E. & Jackle, H. (1991) *Embo Journal* **10**, 2267-78.
3. Small, S., Kraut, R., Hoey, T., Warrior, R. & Levine, M. (1991) *Genes and Development* **5**, 827-39.
4. Liaw, G. J. & Lengyel, J. A. (1993) *Mech Dev* **40**, 47-61.
5. Rivera-Pomar, R., Lu, X., Perrimon, N., Taubert, H. & Jackle, H. (1995) *Nature* **376**, 253-6.
6. Ma, X., Yuan, D., Diepold, K., Scarborough, T. & Ma, J. (1996) *Development* **122**, 1195-206.
7. Kuhnlein, R. P., Bronner, G., Taubert, H. & Schuh, R. (1997) *Mechanisms of Development* **66**, 107-18.
8. La Rosee, A., Hader, T., Taubert, H., Rivera-Pomar, R. & Jackle, H. (1997) *Embo Journal* **16**, 4403-11.
9. Hader, T., La Rosee, A., Ziebold, U., Busch, M., Taubert, H., Jackle, H. & Rivera-Pomar, R. (1998) *Mechanisms of Development* **71**, 177-86.
10. Topol, J., Dearolf, C. R., Prakash, K. & Parker, C. S. (1991) *Genes and Development* **5**, 855-67.
11. Florence, B., Guichet, A., Ephrussi, A. & Laughon, A. (1997) *Development* **124**, 839-47.
12. Stanojevic, D., Hoey, T. & Levine, M. (1989) *Nature* **341**, 331-5.
13. Treisman, J. & Desplan, C. (1989) *Nature* **341**, 335-7.
14. Zhang, C. C., Muller, J., Hoch, M., Jackle, H. & Bienz, M. (1991) *Development* **113**, 1171-9.
15. Qian, S., Capovilla, M. & Pirrotta, V. (1991) *Embo J* **10**, 1415-25.
16. Zuo, P., Stanojevic, D., Colgan, J., Han, K., Levine, M. & Manley, J. L. (1991) *Genes Dev* **5**, 254-64.
17. Pankratz, M. J., Busch, M., Hoch, M., Seifert, E. & Jackle, H. (1992) *Science* **255**, 986-9.
18. Hartmann, C., Taubert, H., Jackle, H. & Pankratz, M. J. (1994) *Mechanisms of Development* **45**, 3-13.
19. Shimell, M. J., Peterson, A. J., Burr, J., Simon, J. A. & O'Connor, M. B. (2000) *Developmental Biology* **218**, 38-52.
20. Pankratz, M. J., Hoch, M., Seifert, E. & Jackle, H. (1989) *Nature* **341**, 337-40.
21. Langeland, J. A., Attai, S. F., Vorwerk, K. & Carroll, S. B. (1994) *Development* **120**, 2945-55.
22. Shimell, M. J., Simon, J., Bender, W. & O'Connor, M. B. (1994) *Science* **264**, 968-71.
23. La Rosee-Borggreve, A., Hader, T., Wainwright, D., Sauer, F. & Jackle, H. (1999) *Mechanisms of Development* **89**, 133-40.
24. Small, S., Blair, A. & Levine, M. (1996) *Developmental Biology* **175**, 314-24.
